# Supplementary material
Source: PubMed Central journal article supplement (PMC3677567)

# Suppl. Fig 1

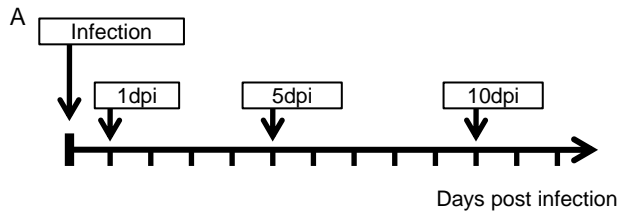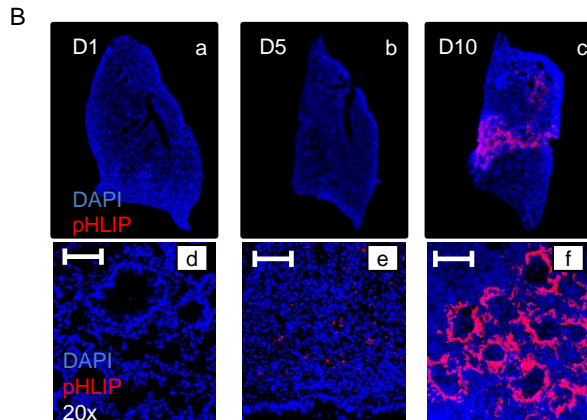

# Suppl. Fig 2

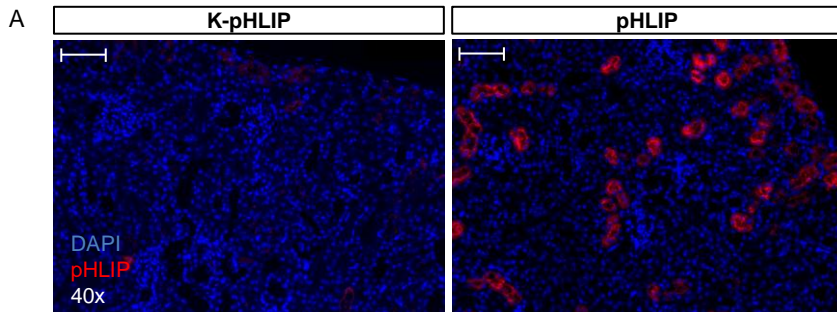

# Suppl. Fig 2

B

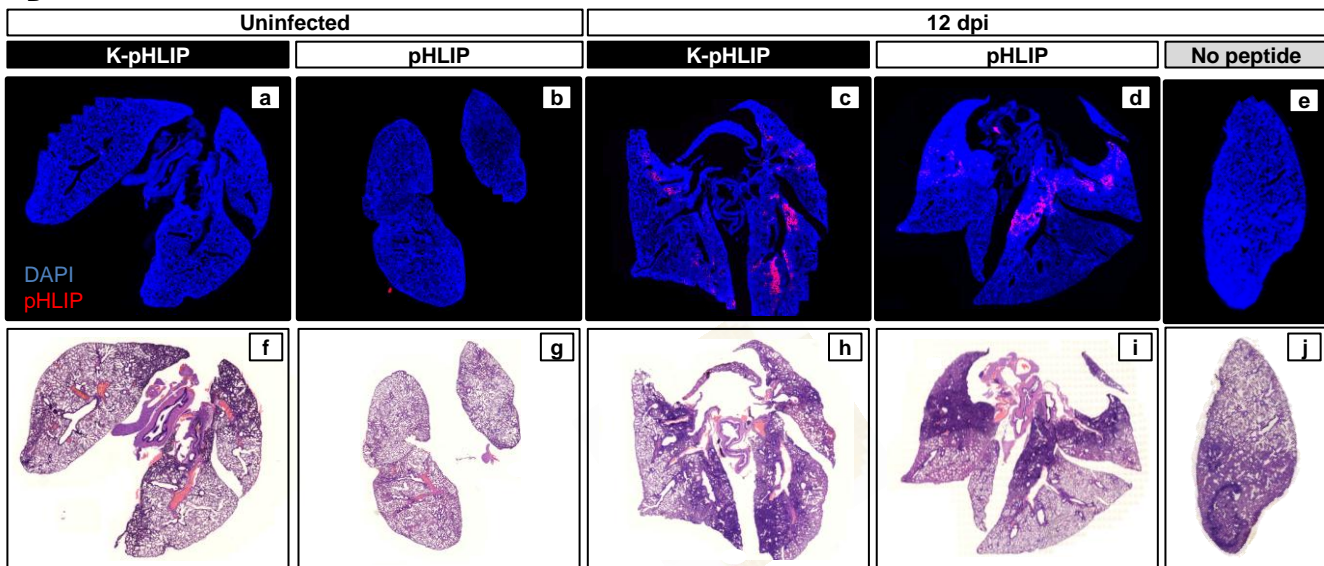

Supplement: NIHMS457149-supplement-1.pdf [file NIHMS457149-supplement-1.pdf]
